# Supplementary material for: 日本工業規格(案)「1/10円すい軸端」(改正案)について(分科会報告No.250)
Source: Royal Society of Chemistry journal article supplement (doi:10.1039/d0an01854f), 1976-11-05
Supplement: d0an01854f1.pdf [file d0an01854f1.pdf]

## Supporting Information

### **An Automated Detection of Influenza Virus based on 3-D Magnetophoretic Separation and Magnetic Label**

Shao-Li Hong<sup>†\*</sup> <sup>a,b,c</sup>, Nangang Zhang<sup>†a,b,c</sup>, Li Qin <sup>a,b,c</sup>, Man Tang <sup>a,b,c</sup>, Zhao Ai <sup>a,b,c</sup>, Aiju,  
Chen <sup>a,b,c</sup>, Shuibing Wang <sup>a,b,c</sup>, Kan Liu<sup>\* a,b,c,d</sup>

<sup>a</sup> School of Electronic and Electrical Engineering, Wuhan Textile University, Wuhan  
430200, People's Republic of China

<sup>b</sup> Hubei Province Engineering Research Center for Intelligent Micro-nano Medical  
Equipment and Key Technologies, Wuhan 30200, People's Republic of China

<sup>c</sup> Hubei Engineering and Technology Research Center for Functional Fiber Fabrication  
and Testing, Wuhan 430200, People's Republic of China

<sup>d</sup> School of Life Science and Technology, University of Electronic Science and  
Technology of China, Chengdu, Sichuan 610054, People's Republic of China

<sup>†</sup>These authors contributed equally to this work.

\*Co-corresponding authors e-mail: [liukan2002@gmail.com](mailto:liukan2002@gmail.com) (K. Liu);  
[slhong@whu.edu.cn](mailto:slhong@whu.edu.cn) (S.L. Hong);

## Table of Contents

### S.1 Microscopic images of glass capillary

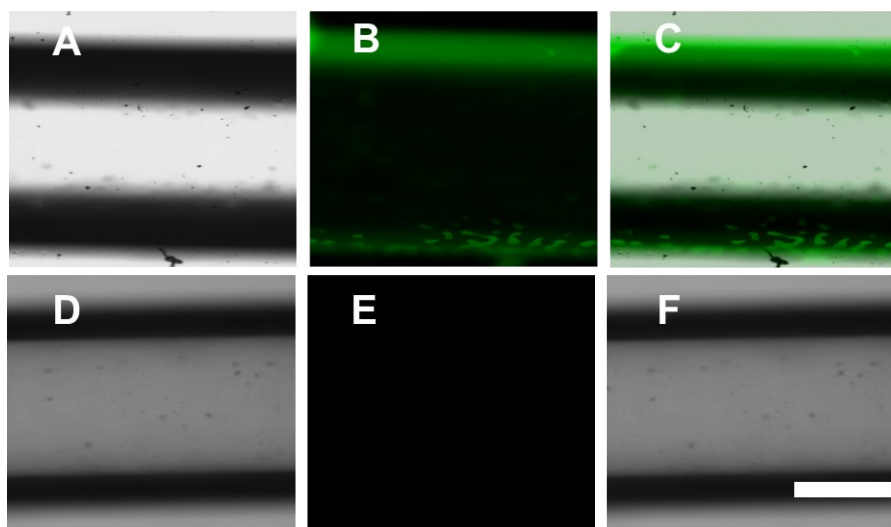

Figure S1. (A-C) Microscopic images of antibody modified glass capillary (bright field, fluorescence field, and merge, respectively). (D-F) Microscopic images of magnetic beads without antibody modification. The scale bar is 100  $\mu\text{m}$ .

### S.2 Calculation of separation efficiency

The calculation of separation efficiency was taken Uv-Vis absorption quantitation. The absorbance at 600 nm was proportional to its concentration of magnetic beads, thus the separation effectiveness could be calculated by the equation:

$$\varphi_e = (1 - A_2/A_1) \times 100\%$$

Where  $\varphi_e$  is the separation efficiency,  $A_2$  is the absorbance of solution at 600 nm after 3-D magnetophoretic separation, and  $A_1$  is the absorbance of the original solutions at 600 nm.

### S3 Specificity Analysis

To investigate whether there is a statistically significant difference, p analysis was

further calculated, and the results were shown in figure S2 with a significant difference.

\*means  $p < 0.05$ .

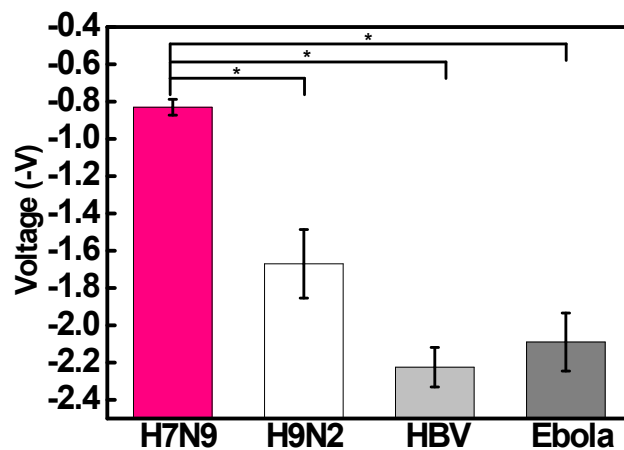

Figure S2. Histograms of the results of the specificity using this method. Error bars =  $\pm$ SD, and  $n = 3$ .

**Table S1. Intra- and Interassay Variability of This Method.**

Table.S1 Intra- and Interassay Variability of This Method.

|             | Mean  | SD     | CV (n=5) |
|-------------|-------|--------|----------|
| Intra-assay | -0.83 | -0.044 | 5.3 %    |
| Interassay  | -0.91 | -0.068 | 7.5 %    |
